# Supplementary material
Source: PubMed Central journal article supplement (PMC2785912)
Supplement: NIHMS91768-supplement-01.pdf [file NIHMS91768-supplement-01.pdf]

## **Supplemental Data**

### **Chromatin Signatures in Multipotent Human Hematopoietic Stem Cells Indicate**

### **the Fate of Bivalent Genes during Differentiation**

**Kairong Cui, Chongzhi Zang, Tae-Young Roh, Dustin E. Schones, Richard W. Childs, Weiqun Peng, and Keji Zhao**

#### **Supplemental Experimental Procedures**

##### **Solexa Pipeline Analysis**

Sequence reads of mostly 25 bp were obtained using the Solexa Analysis Pipeline. All reads were aligned to the human genome (hg18) and only uniquely mapping reads were retained. In all analyses, reads of multiple identical copies were truncated to contain at most five copies to reduce potential biases. The output of the Solexa Analysis Pipeline was converted to browser extensible data (BED) files detailing the genomic coordinates of each tag. To make the files for visualization on a genome browser, reads originating in non-overlapping 200 bp windows were summed, with the location of reads on positive (negative) strand shifted by +75 bps (-75bps) from its 5' start to represent the center of DNA fragments.

The sequence reads have been deposited in the Short Reads Archive (GSE12646). The BED files can be downloaded from the website (<http://dir.nhlbi.nih.gov/papers/lmi/epigenomes/hghscmethylation.html>).

### **Identification of ChIP enriched islands**

To eliminate background noise, we determined ChIP enriched regions using the “islands” method (manuscript in preparation, Weiqun Peng et al.) for each ChIP sample. Briefly, this involves identifying clusters of windows occupied by reads that are unlikely to appear by chance. All eligible summary windows were first identified, with an eligible window being defined as those windows satisfying a required window tag-count threshold determined from a preset  $p$ -value based on a Poisson background model. Islands were then identified by grouping consecutive eligible windows allowing gaps of at most two ineligible windows, with a island tag-count threshold determined by a E-value requirement of 100 (manuscript in preparation by Weiqun Peng et. al.) under the background model of random reads. The resulting islands identified for each library have an estimated false discovery rate of less than 1%.

### **Gene expression and its correlation with histone modifications**

Expression information was obtained for CD133<sup>+</sup> and CD36<sup>+</sup> cells using Affymetrix human genome U133 Plus 2.0 arrays. The coordinates for UCSC known genes (Karolchik et al., 2004) were obtained from the UCSC table browser. U133P2 probes were mapped to UCSC genes by the table provided by the UCSC table browser. Genes without corresponding U133P2 ID were ignored. If multiple genes map to the same U133P2 ID, only one was retained. This process resulted in 20,444 genes after further removal of two genes on chromosome M (**Table S6**). Two types of correlation plots were made: 1) Correlation of gene expression value with histone modification levels. For correlation at the promoter, reads in the island-filtered summary windows that overlapped

with promoters (defined as 1000 bp upstream and downstream of TSS) were summed for each gene to represent the modification level at the promoter. The genes were then grouped into 100-gene sets according to their expression values. Each set of genes is represented by a dot on the plot, with its representative expression (modification) level obtained as the geometric mean of the expression values (tag counts). If a promoter has no modification, a pseudo count of 1 was used. Correlations in gene body regions were obtained in a similar manner. 2) Correlation of gene expression changes with modification changes across cell type. Promoter and gene body regions were analyzed in a similar manner. We use promoter to illustrate the approach. For a gene, the normalized modification level was defined as the sum of the reads in the island-filtered summary windows that overlap the promoter (If a promoter has no modification, a pseudo count of 10 is used.) normalized by total number of island-filtered tag count. The change of modification level was calculated as the logarithm of the ratio of the normalized modification levels in the two cell types. The change of expression level was calculated as the logarithm of the ratio of the expression levels in the two cell types. Now each gene is associated with both an expression change and a modification change. The genes were then grouped in 100-gene sets, with their expression changes and modification changes averaged to represent one dot in the plot.

### **Identification of promoters with bivalent domains**

A promoter was identified as having a bivalent domain if it overlapped with both an H3K4me3 island and an H3K27me3 island.

### **Profiles of tag density in and around genes**

For each gene, island-filtered reads were summed according to their shifted positions in 1 kb windows for the regions from 5 kb upstream of the transcription start site (txStart) to the txStart and from the transcription end site (txEnd) to 5 kb downstream. Within the gene bodies, island-filtered reads were summed according to their shifted positions in windows equal to 5% of the gene length. All window tag-counts were normalized by the total number of bases in the windows, and the total number of island-filtered reads in the corresponding sample to obtain normalized tag density.

### **Identification of transcription factor genes**

Transcription factor genes were obtained by identifying all genes with the following GO terms: GO:0030528 (transcription regulator activity), GO:0003702 (RNA polymerase II transcription factor activity), GO:0003705 (RNA polymerase II transcription factor activity, enhancer binding), GO:0016251 (general RNA polymerase II transcription factor activity), GO:0003703 (general RNA polymerase II transcription factor activity), GO:0016252 (nonspecific RNA polymerase II transcription factor activity), GO:0003704 (specific RNA polymerase II transcription factor activity), GO:0016563 (transcription activator activity), GO:0016564 (transcription repressor activity), GO:0003700 (transcription factor activity), GO:0006357 (regulation of transcription from RNA polymerase II promoter), GO:0006358 (regulation of global transcription from RNA polymerase II promoter), GO:0006366 (transcription from RNA polymerase II promoter), GO:0006367 (transcription initiation from RNA polymerase II promoter), GO:0003712 (transcription cofactor activity), GO:0003713 (transcription coactivator activity),

GO:0003714 (transcription corepressor activity), GO:0006350 (transcription),  
GO:0006351 (transcription, DNA-dependent), GO:0006355 (regulation of transcription,  
DNA-dependent)

### **Gene ontology analysis**

Genes showing more than 4-fold difference in their expression level were used for gene ontology (GO) analysis. Top 4 GO terms enriched in the biological process analysis were selected and plotted for upregulated and downregulated genes (Dennis et al., 2003).

### **Supplemental References**

Dennis, G., Jr., Sherman, B. T., Hosack, D. A., Yang, J., Gao, W., Lane, H. C., and Lempicki, R. A. (2003). DAVID: Database for Annotation, Visualization, and Integrated Discovery. *Genome Biol* 4, P3.

Karolchik, D., Hinrichs, A. S., Furey, T. S., Roskin, K. M., Sugnet, C. W., Haussler, D., and Kent, W. J. (2004). The UCSC Table Browser data retrieval tool. *Nucleic Acids Res* 32, D493-496.

Table S1. Genome-wide distribution of modification islands for various modifications in CD133 and CD36 cells

|      |          | Total islands | Promoters | Gene Bodies | exons | introns | intergenic |
|------|----------|---------------|-----------|-------------|-------|---------|------------|
| CD34 | H3K4me3  | 17775         | 11545     | 2161        | 575   | 1586    | 4069       |
| CD34 | H3K4me1  | 55974         | 2465      | 29119       | 1356  | 27763   | 24390      |
| CD34 | H3K27me3 | 40274         | 2165      | 11388       | 666   | 10722   | 26721      |
| CD34 | H3K27me1 | 54599         | 1064      | 38024       | 2253  | 35771   | 15511      |
| CD34 | H3K9me1  | 67218         | 2225      | 45094       | 2488  | 42606   | 19899      |
| CD34 | H3K9me3  | 51127         | 252       | 14774       | 387   | 14387   | 36101      |
| CD34 | H3K36me3 | 67135         | 803       | 51382       | 4565  | 46817   | 14950      |
| CD34 | H4K20me1 | 43909         | 1145      | 34326       | 2335  | 31991   | 8438       |
| CD34 | H2AZ     | 59350         | 10883     | 13872       | 829   | 13043   | 34595      |
| CD34 | PoIII    | 38187         | 6656      | 20350       | 1914  | 18436   | 11181      |
|      |          |               |           |             |       |         |            |
| CD36 | H3K4me3  | 13016         | 9476      | 1155        | 237   | 918     | 2385       |
| CD36 | H3K4me1  | 53972         | 3333      | 30220       | 1433  | 28787   | 20419      |
| CD36 | H3K27me3 | 30391         | 1916      | 9194        | 563   | 8631    | 19281      |
| CD36 | H3K27me1 | 42745         | 569       | 27217       | 1308  | 25909   | 14959      |
| CD36 | H3K9me1  | 53220         | 935       | 39717       | 1877  | 37840   | 12568      |
| CD36 | H3K9me3  | 43571         | 379       | 10269       | 391   | 9878    | 32923      |
| CD36 | H3K36me3 | 40455         | 500       | 31934       | 2741  | 29193   | 8021       |
| CD36 | H4K20me1 | 30976         | 1448      | 21225       | 1640  | 19585   | 8303       |
| CD36 | H2AZ     | 46371         | 8432      | 11076       | 545   | 10531   | 26863      |
| CD36 | PoIII    | 40591         | 5622      | 25697       | 2465  | 23232   | 9272       |

**Table S1. Genome-wide distribution of modification islands for various**

**modifications in CD133<sup>+</sup> and CD36<sup>+</sup> cells.** The ChIP-Seq-positive regions were

identified as modification islands (see Experimental Procedures for details). Promoters

indicate the genomic regions spanning the TSSs (-1 kb to + 1 kb). Gene Bodies indicate

the regions from +1 kb downstream of TSS to the 3' ends of genes.

Table S4. Histone modification patterns of bivalent genes

| Modification | All BD (2910) |      | Lost K27me3 (541) |      | Lost K4me3 (1549) |      | Lost Both (127) |      | Remained BD (693) |      |
|--------------|---------------|------|-------------------|------|-------------------|------|-----------------|------|-------------------|------|
|              | CD133         | CD36 | CD133             | CD36 | CD133             | CD36 | CD133           | CD36 | CD133             | CD36 |
| H2AZ         | 2072          | 1091 | 469               | 420  | 919               | 151  | 44              | 23   | 640               | 497  |
| H3K4me1      | 574           | 706  | 248               | 395  | 128               | 58   | 13              | 32   | 185               | 221  |
| H3K4me3      | 2910          | 1234 | 541               | 541  | 1549              | 0    | 127             | 0    | 693               | 693  |
| H3K9me1      | 750           | 224  | 277               | 147  | 244               | 11   | 37              | 9    | 192               | 57   |
| H3K9me3      | 234           | 387  | 40                | 42   | 138               | 244  | 8               | 8    | 48                | 93   |
| H3K27me1     | 64            | 50   | 43                | 38   | 2                 | 0    | 0               | 1    | 19                | 11   |
| H3K27me3     | 2910          | 2242 | 541               | 0    | 1549              | 1549 | 127             | 0    | 693               | 693  |
| H3K36me3     | 55            | 80   | 19                | 57   | 23                | 5    | 3               | 0    | 10                | 18   |
| H4K20me1     | 886           | 1426 | 282               | 207  | 339               | 896  | 45              | 68   | 220               | 255  |
| H4K20me3     | 58            | 122  | 11                | 24   | 30                | 77   | 4               | 4    | 13                | 17   |
| PoIII        | 314           | 357  | 186               | 258  | 23                | 17   | 5               | 5    | 100               | 77   |

**Table S4. Histone modification patterns of CD133+ bivalent genes.** Among the 2,910 bivalent promoters, the number of promoters associated with each modification is listed in the total and four subgroups. BD: promoters associated with bivalent modifications.

Table S5. Promoters associated with H3K4me1, H3K9me1 or H3K27me1 but not H3K4me3

|                                                         | No. in CD133 | No. in CD36 | % in CD133  | % in CD36          |
|---------------------------------------------------------|--------------|-------------|-------------|--------------------|
| <b>1321 promoters with H3K4me1</b>                      |              |             |             |                    |
| H2AZ                                                    | 644          | 346         | 48.75094625 | 26.19227858        |
| <b>H3K4me1</b>                                          | <b>1321</b>  | <b>625</b>  | <b>100</b>  | <b>47.31264194</b> |
| H3K4me3                                                 | 0            | 82          | 0           | 6.207418622        |
| H3K9me1                                                 | 942          | 429         | 71.30961393 | 32.47539743        |
| H3K9me3                                                 | 24           | 41          | 1.81680545  | 3.103709311        |
| H3K27me1                                                | 571          | 217         | 43.22482967 | 16.42694928        |
| H3K27me3                                                | 71           | 144         | 5.374716124 | 10.9008327         |
| H3K36me3                                                | 260          | 345         | 19.68205905 | 26.11657835        |
| H4K20me1                                                | 484          | 333         | 36.63890992 | 25.20817562        |
| PoII                                                    | 289          | 241         | 21.87736563 | 18.24375473        |
| <b>1475 promoters with H3K9me1</b>                      |              |             |             |                    |
| H2AZ                                                    | 436          | 235         | 29.55932203 | 15.93220339        |
| H3K4me1                                                 | 942          | 655         | 63.86440678 | 44.40677966        |
| H3K4me3                                                 | 0            | 71          | 0           | 4.813559322        |
| <b>H3K9me1</b>                                          | <b>1475</b>  | <b>607</b>  | <b>100</b>  | <b>41.15254237</b> |
| H3K9me3                                                 | 33           | 44          | 2.237288136 | 2.983050847        |
| H3K27me1                                                | 746          | 275         | 50.57627119 | 18.6440678         |
| H3K27me3                                                | 89           | 132         | 6.033898305 | 8.949152542        |
| H3K36me3                                                | 506          | 605         | 34.30508475 | 41.01694915        |
| H4K20me1                                                | 852          | 575         | 57.76271186 | 38.98305085        |
| PoII                                                    | 376          | 375         | 25.49152542 | 25.42372881        |
| <b>1106 promoters with H3K27me1</b>                     |              |             |             |                    |
| H2AZ                                                    | 260          | 158         | 23.50813743 | 14.28571429        |
| H3K4me1                                                 | 571          | 433         | 51.62748644 | 39.15009042        |
| H3K4me3                                                 | 0            | 30          | 0           | 2.712477396        |
| H3K9me1                                                 | 746          | 470         | 67.45027125 | 42.4954792         |
| H3K9me3                                                 | 41           | 38          | 3.707052441 | 3.435804702        |
| <b>H3K27me1</b>                                         | <b>1106</b>  | <b>324</b>  | <b>100</b>  | <b>29.29475588</b> |
| H3K27me3                                                | 5            | 27          | 0.452079566 | 2.441229656        |
| H3K36me3                                                | 630          | 641         | 56.96202532 | 57.95660036        |
| H4K20me1                                                | 524          | 337         | 47.37793852 | 30.47016275        |
| PoII                                                    | 280          | 297         | 25.3164557  | 26.85352622        |
| <b>499 promoters with H3K4me1, H3K9me1 and H3K27me1</b> |              |             |             |                    |
| H2AZ                                                    | 196          | 117         | 39.27855711 | 23.44689379        |
| H3K4me1                                                 | 499          | 303         | 100         | 60.72144289        |
| H3K4me3                                                 | 0            | 27          | 0           | 5.410821643        |
| H3K9me1                                                 | 499          | 275         | 100         | 55.11022044        |
| H3K9me3                                                 | 8            | 13          | 1.603206413 | 2.605210421        |
| H3K27me1                                                | 499          | 159         | 100         | 31.86372745        |
| H3K27me3                                                | 4            | 23          | 0.801603206 | 4.609218437        |
| H3K36me3                                                | 187          | 233         | 37.4749499  | 46.69338677        |
| H4K20me1                                                | 292          | 186         | 58.51703407 | 37.2745491         |
| PoII                                                    | 168          | 140         | 33.66733467 | 28.05611222        |

**Table S5. Promoters associated with H3K4me1, H3K9me1 or H3K27me1 but not H3K4me3.** The promoters associated with any of these modifications but not H3K4me3 were identified in CD133<sup>+</sup> cells and examined for the presence of other modifications. The association of all the modifications with these promoters was also examined in CD36<sup>+</sup> cells. The % in CD133<sup>+</sup> cells indicates the percentage of promoters associated with a specific modification in CD133<sup>+</sup> cells; the % in CD36<sup>+</sup> cells indicates the percentage of promoters remained positive for a specific modification in CD36<sup>+</sup> cells.



Figure S1

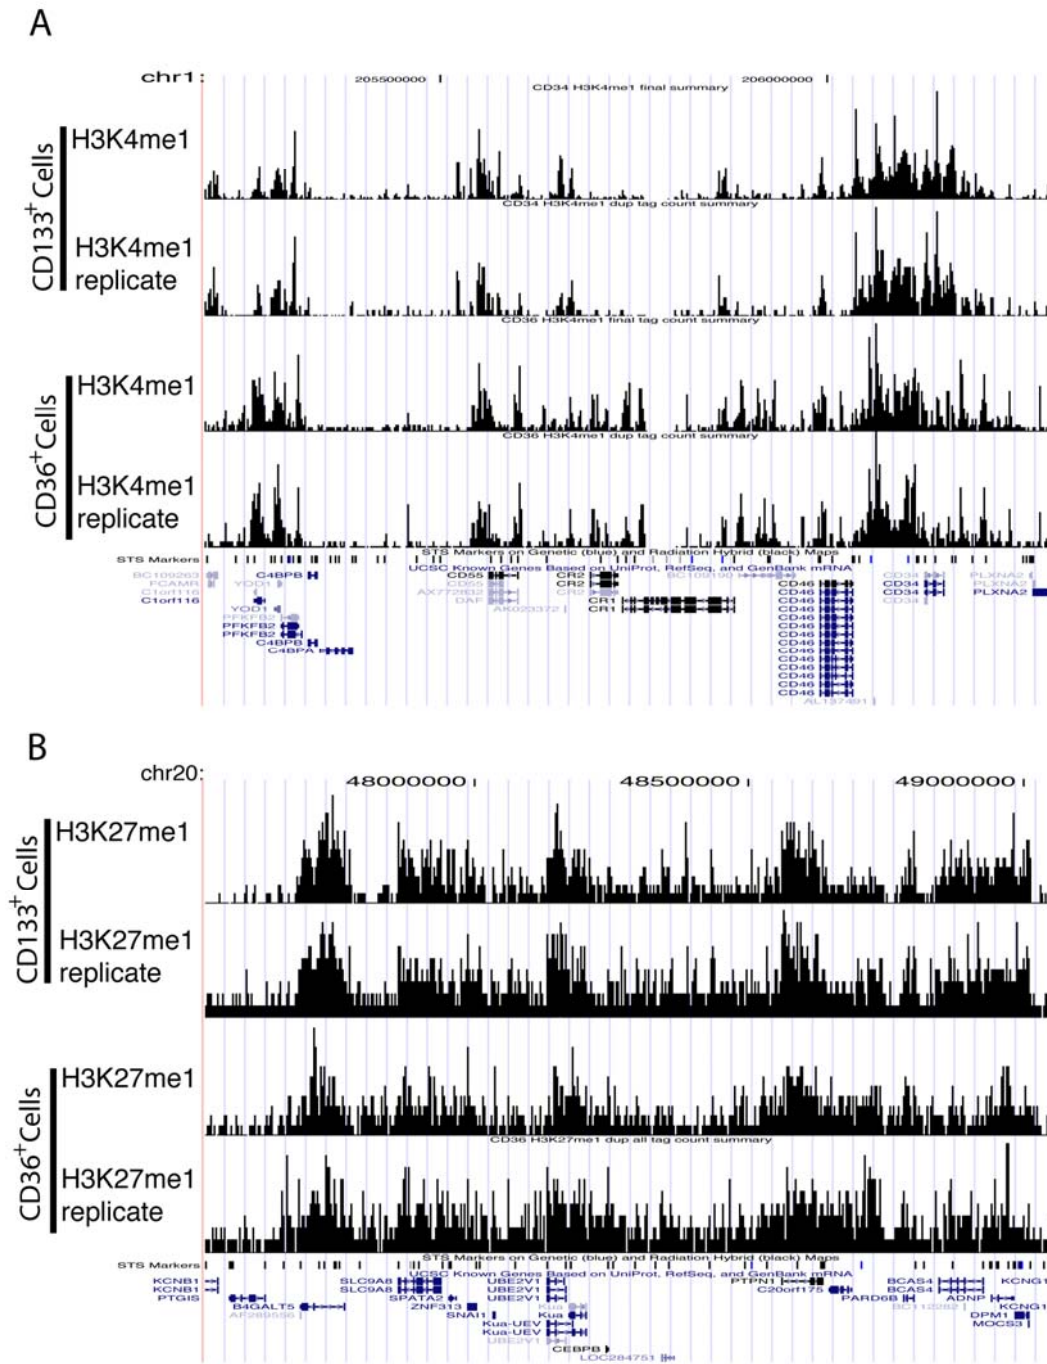

**Figure S1. Reproducibility of histone modification patterns.** Biological replicate ChIP-Seq analyses were performed for H3K4me1 (A) and H3K27me1 (B) in CD133<sup>+</sup> and CD36<sup>+</sup> cells, respectively. The data are displayed as custom tracks on the UCSC genome browser. Y-axis shows the number of sequence reads detected in 200 bp-windows and x-axis shows the chromosome coordinates in the genome.

Figure S2

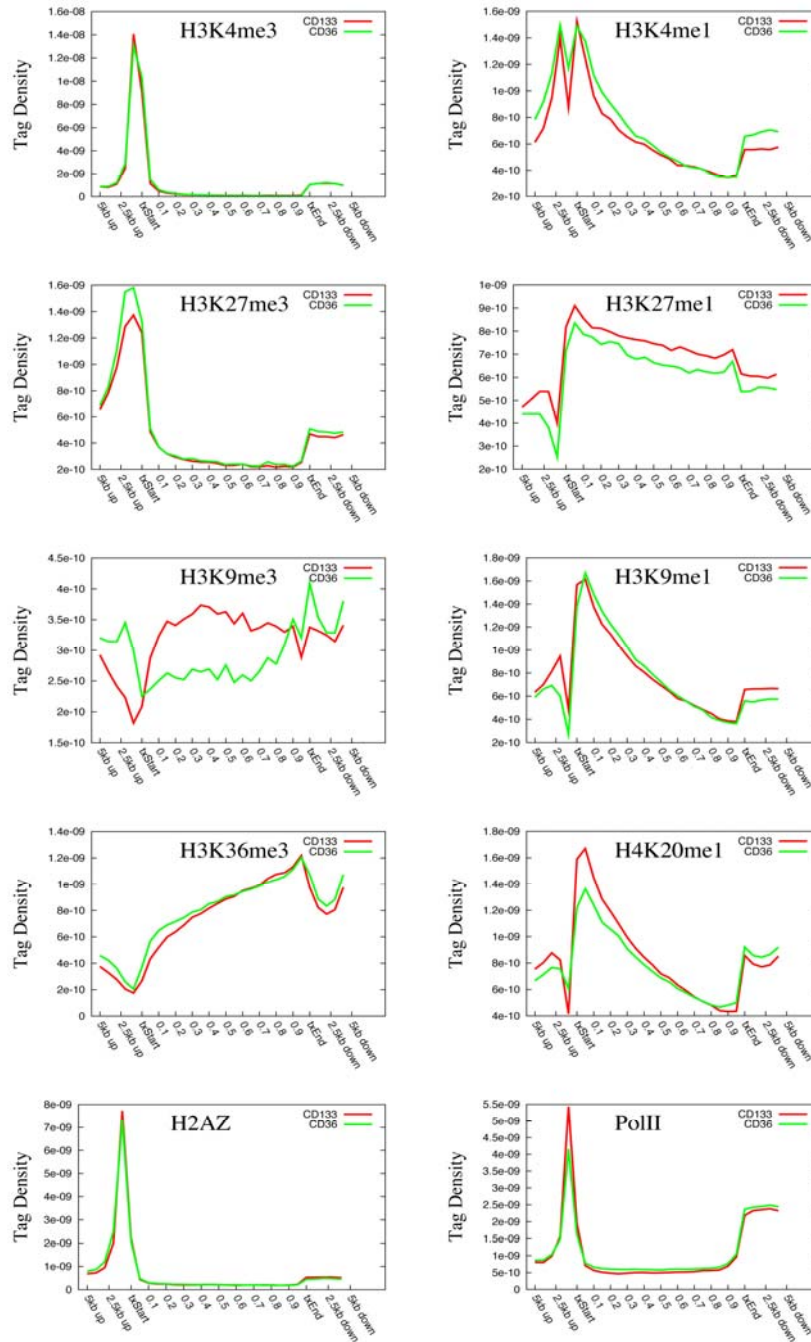

**Figure S2. Histone modification profiles of all genes in CD133<sup>+</sup> and CD36<sup>+</sup> cells.** Histone methylation profiles of 20,446 genes across the gene bodies as well as 5 kb 5' and 3' of the gene bodies. The modification patterns are shown in red in CD133<sup>+</sup> cells and in green in CD36<sup>+</sup> cells.

Figure S3

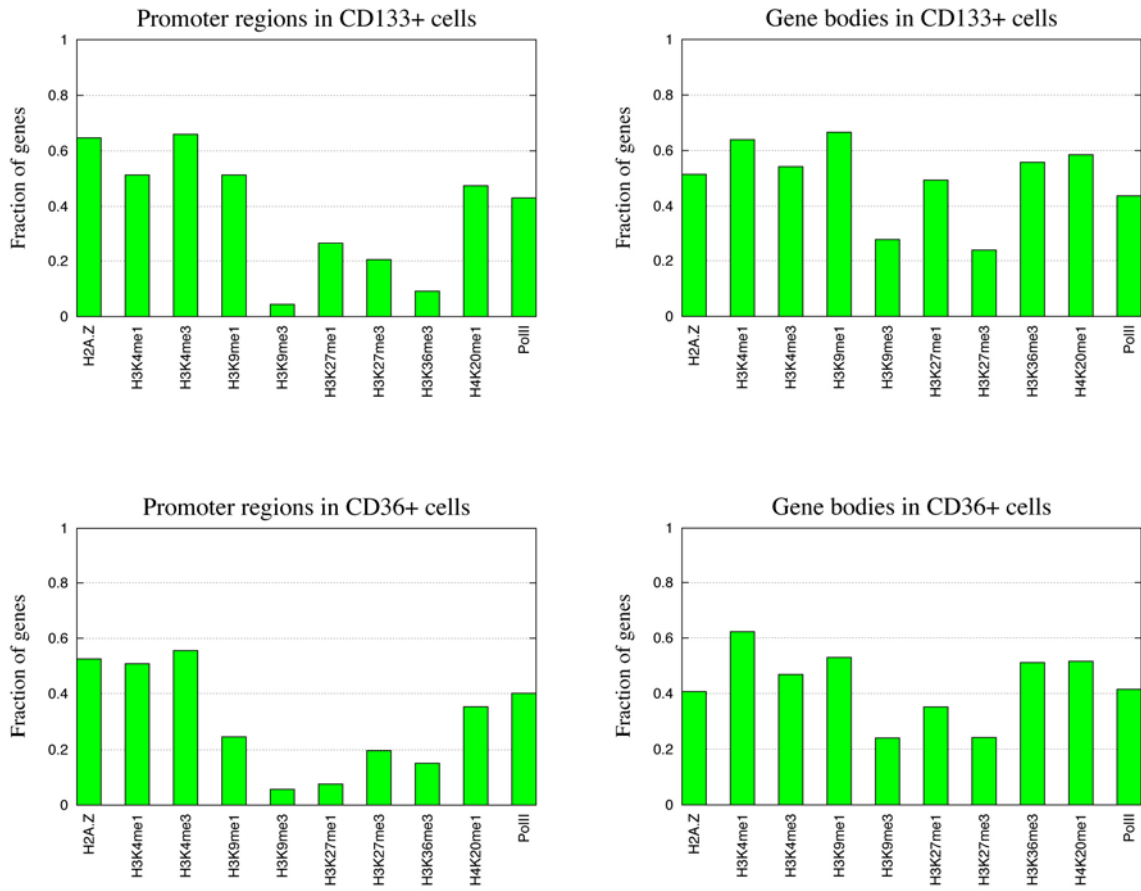

**Figure S3. Association of histone modification islands with genomic regions.** The fractions of human promoters and gene bodies associated with each histone modification in CD133<sup>+</sup> and CD36<sup>+</sup> cells are shown.

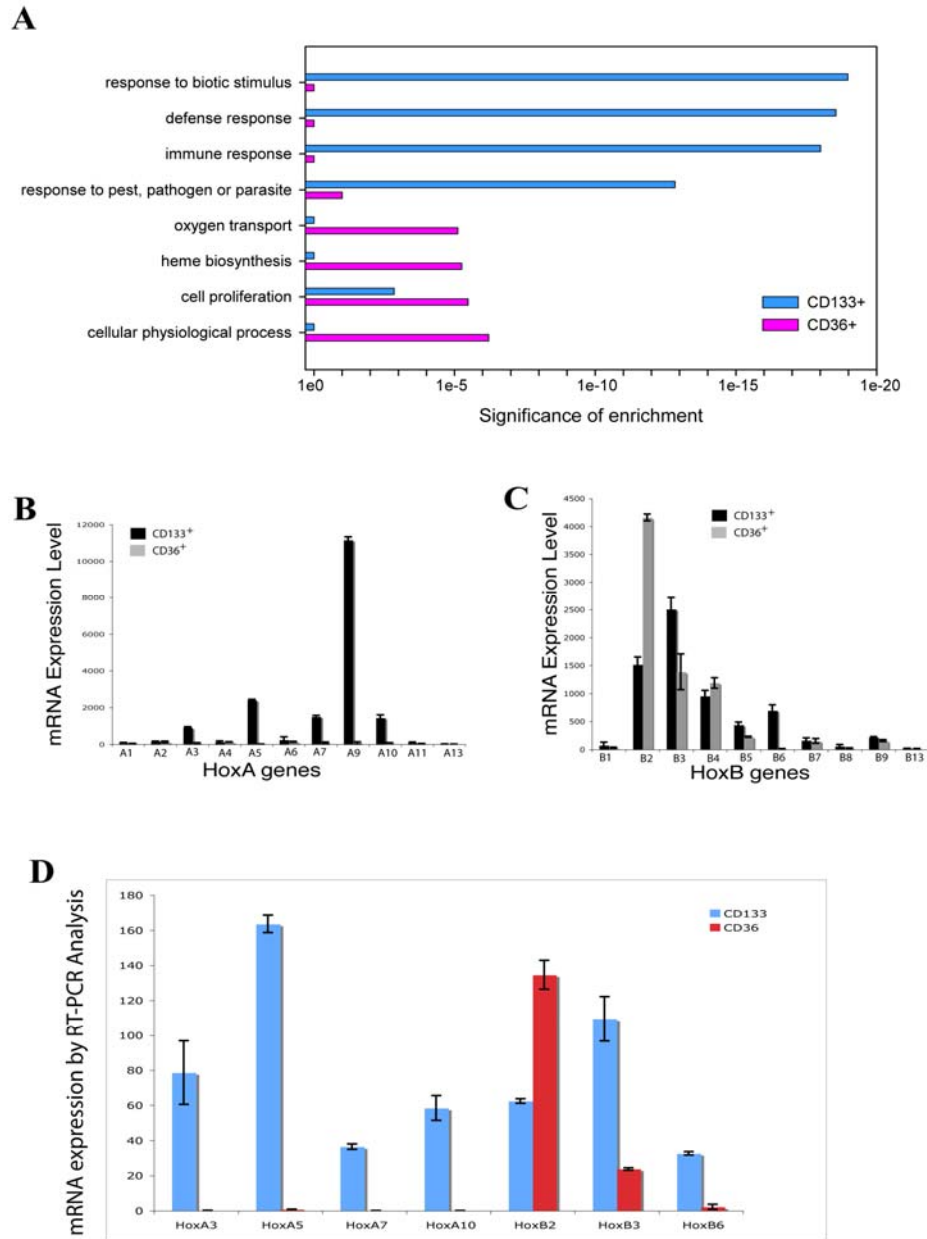

**Figure S4. Genome-wide gene expression changes reveal commitment to erythrocyte and inhibition of other lineages.**

**A.** Ontology analysis of genes differentially expressed between CD133<sup>+</sup> and CD36<sup>+</sup> cells. See Experimental Procedures for details.

**B.** mRNA expression level of *HoxA* genes in CD133<sup>+</sup> and CD36<sup>+</sup> cells. The data were obtained from the DNA microarray analysis. Error bars indicate standard deviation.

**C.** mRNA expression level of *HoxB* genes in CD133<sup>+</sup> and CD36<sup>+</sup> cells.

**D.** Real-time PCR analysis confirmed the expression data obtained by DNA microarrays.

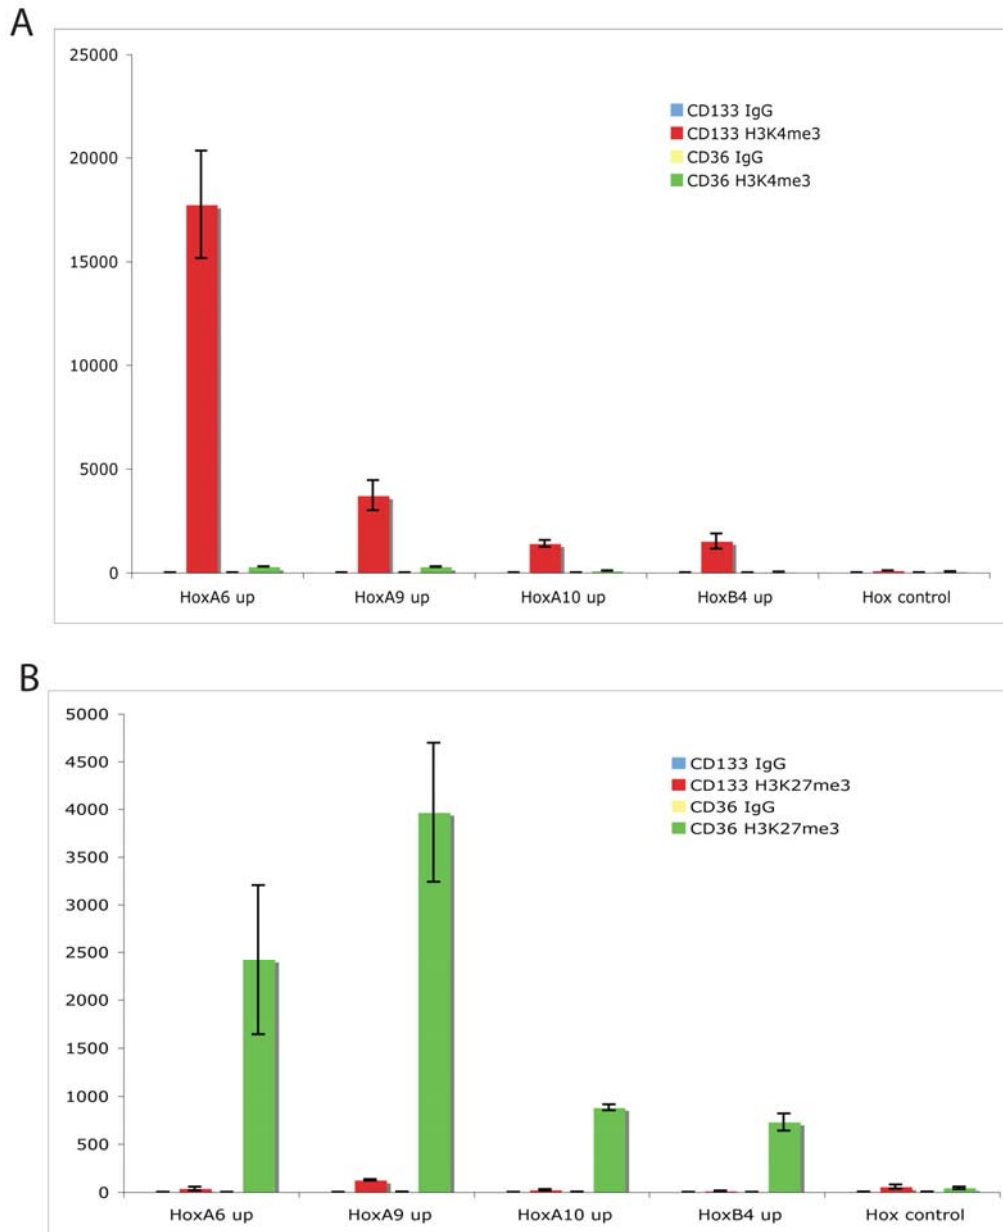

**Figure S5. Confirmation of the ChIP-Seq data using real-time PCR assays.** The association of H3K4me3 (A) and H3K27me3 with selected regions in the HoxA and HoxB loci was confirmed using real-time PCR assays. up: the region upstream of TSS. Y-axis indicates the enrichment of specific regions as measured by the number of copies for each region present in different samples.

## HOXA5-10 Genes

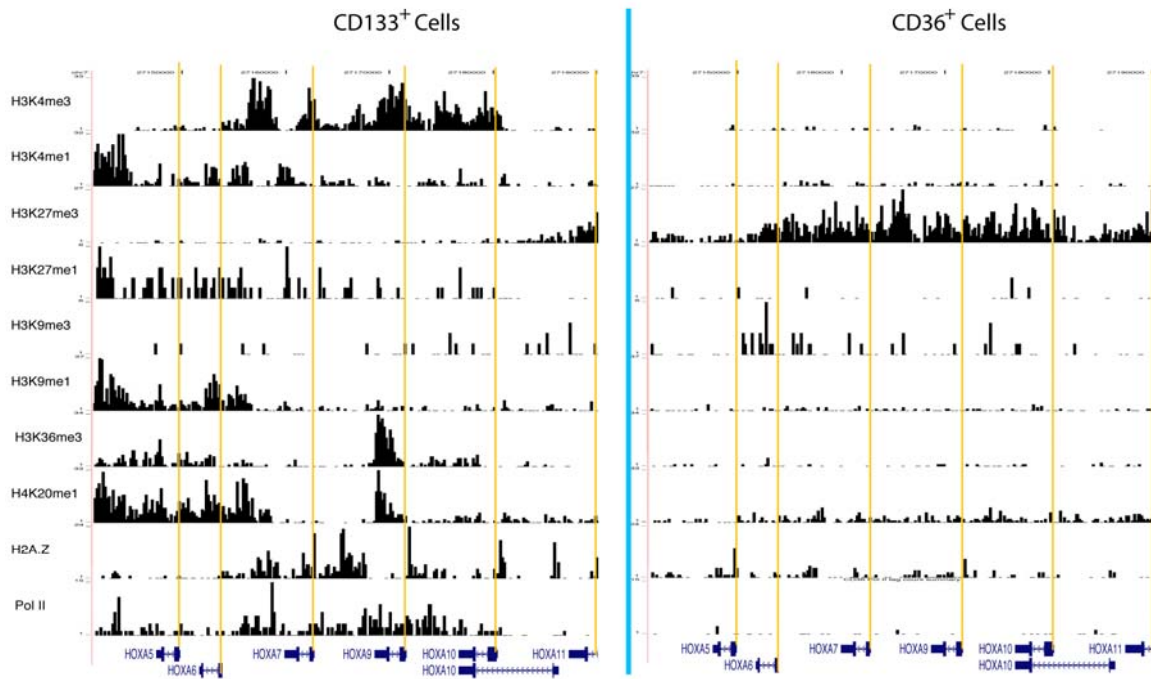

**Figure S6. Histone modification changes in the *Hox A* locus (Chr7:27,140,000-27,190,000) in CD133<sup>+</sup> and CD36<sup>+</sup> cells.** The data are displayed as custom tracks on the UCSC genome browser. The positions of the *HoxA* genes are indicated below the panel. Y-axis shows the number of sequence reads detected in 200 bp-windows and x-axis shows the chromosome coordinates in the genome. The annotated TSSs are indicated by vertical orange lines.

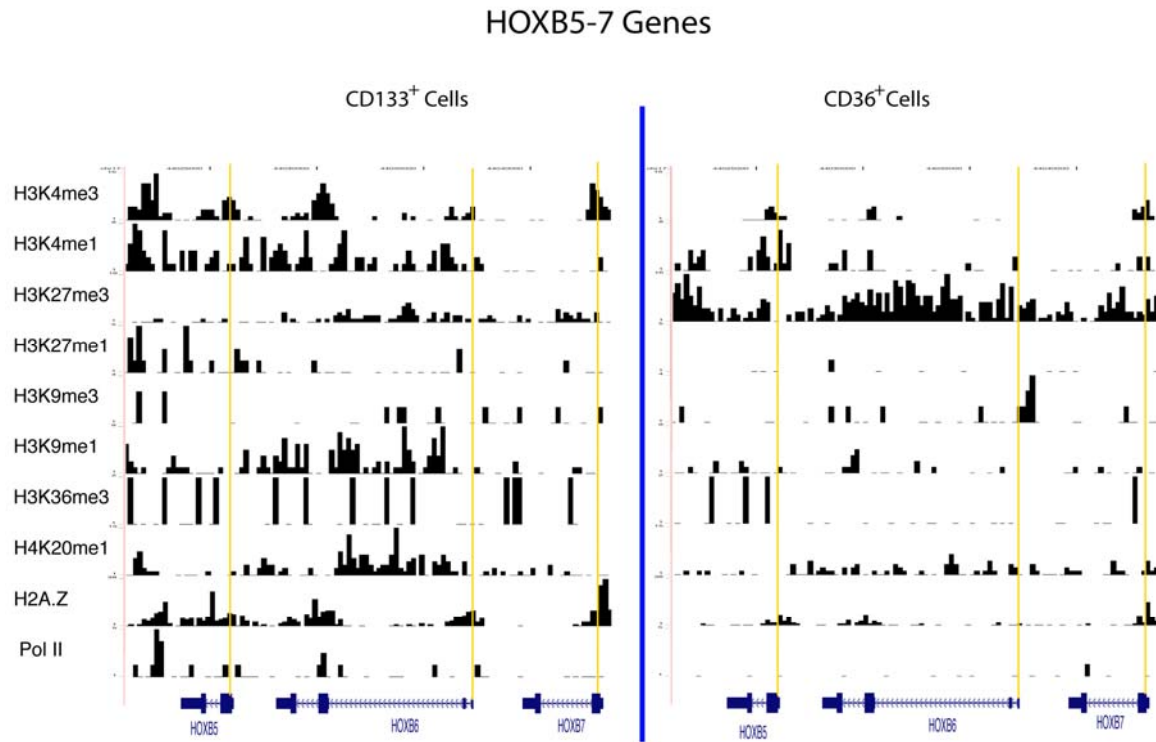

**Figure S7. Histone modification changes in the *Hox B* locus (Chr17:44,020,000-44,045,000) in CD133<sup>+</sup> and CD36<sup>+</sup> cells.** The positions of the *Hox B* genes are indicated below the panel. The annotated TSSs are indicated by vertical orange lines.



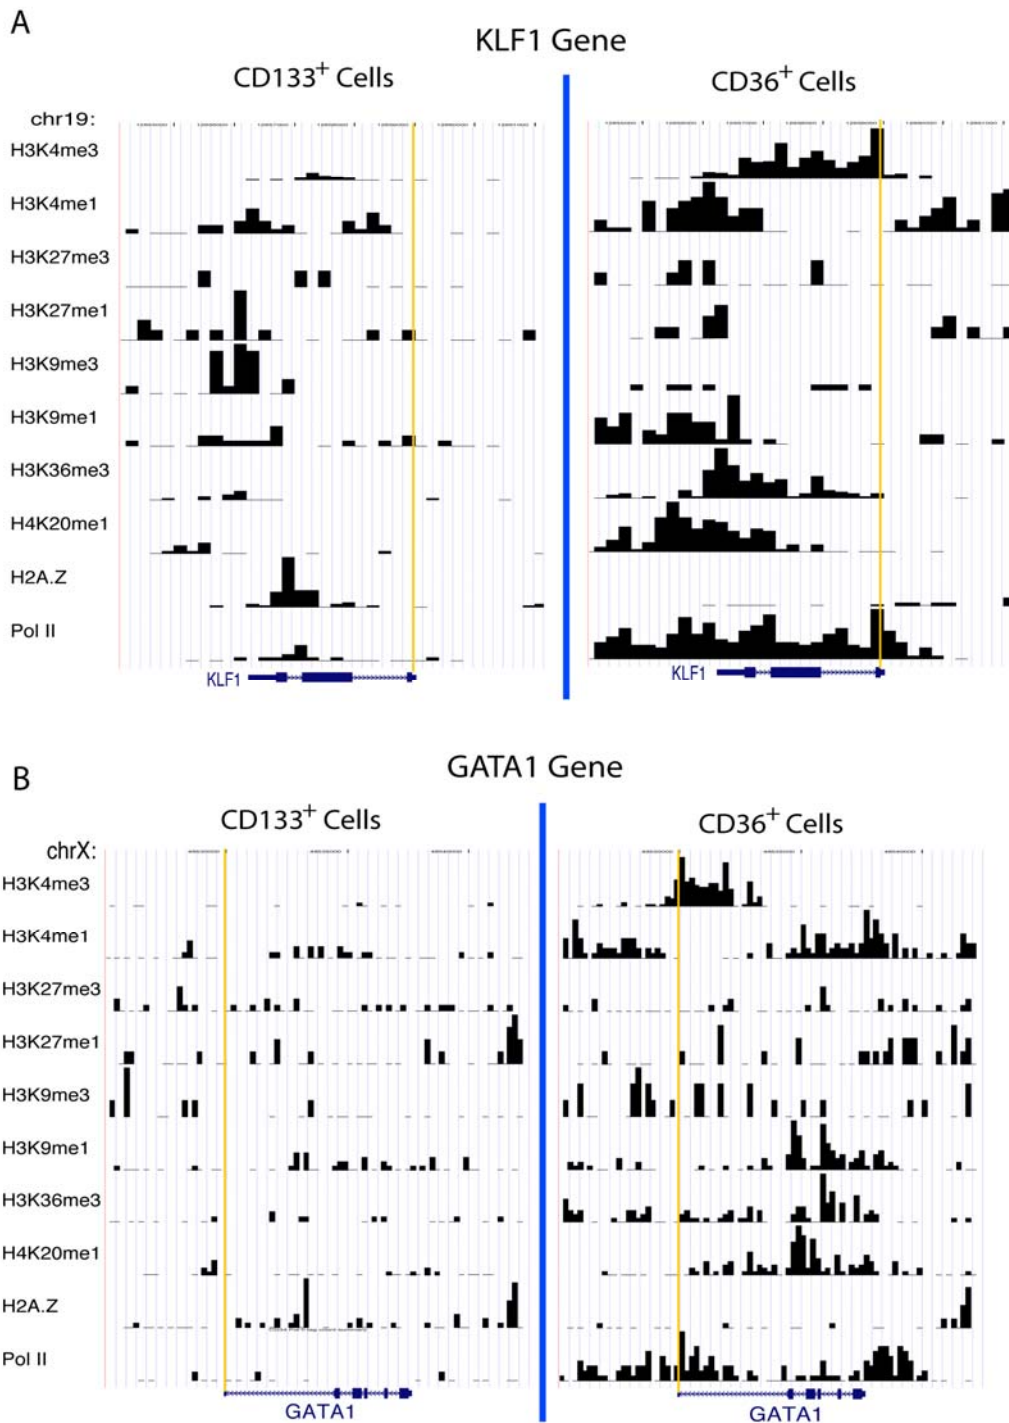

**Figure S8. Histone modification profiles of the *KLF1* gene (Chr19:12,854,001-12,861,254) and *GATA1* gene (ChrX:48,525,060-48,542,506) before (CD133<sup>+</sup> cells) and after (CD36<sup>+</sup> cells) differentiation. The annotated TSSs are indicated by vertical orange lines.**



CD133 Gene

Figure S9

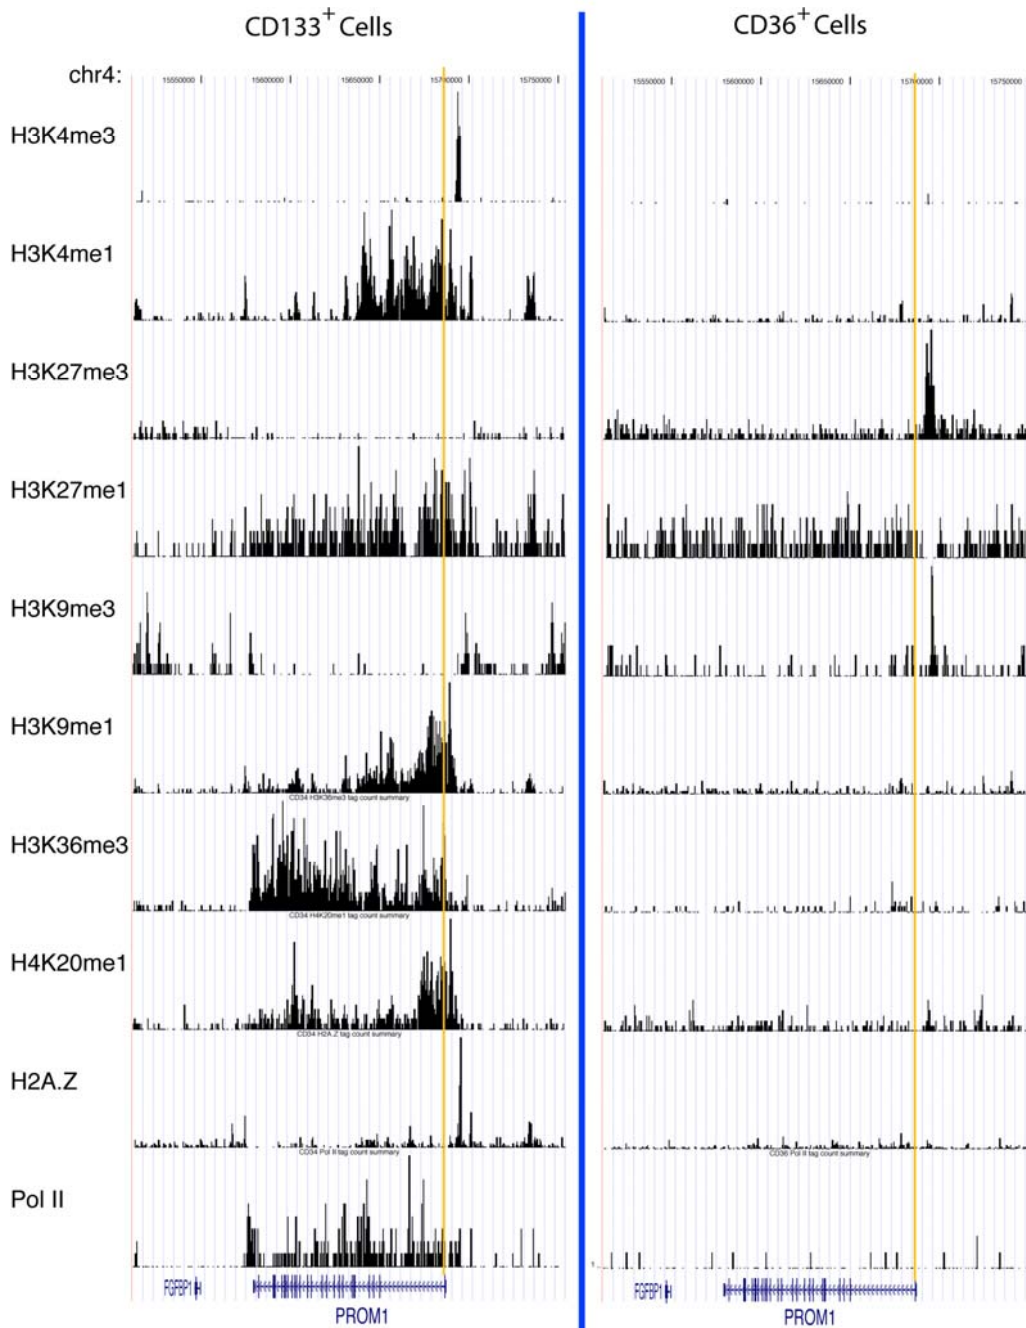

**Figure S9. Histone modification profiles of the *CD133* gene (Chr4:15,511,636-15,753,983) before (*CD133*<sup>+</sup> cells) and after (*CD36*<sup>+</sup> cells) differentiation.** The data are displayed as custom tracks on the UCSC genome browser. The position and direction of transcription of the *CD133* gene are indicated below the panel. The annotated TSS is indicated by a vertical orange line. The histone modification patterns suggest that the actual TSS may be located upstream.

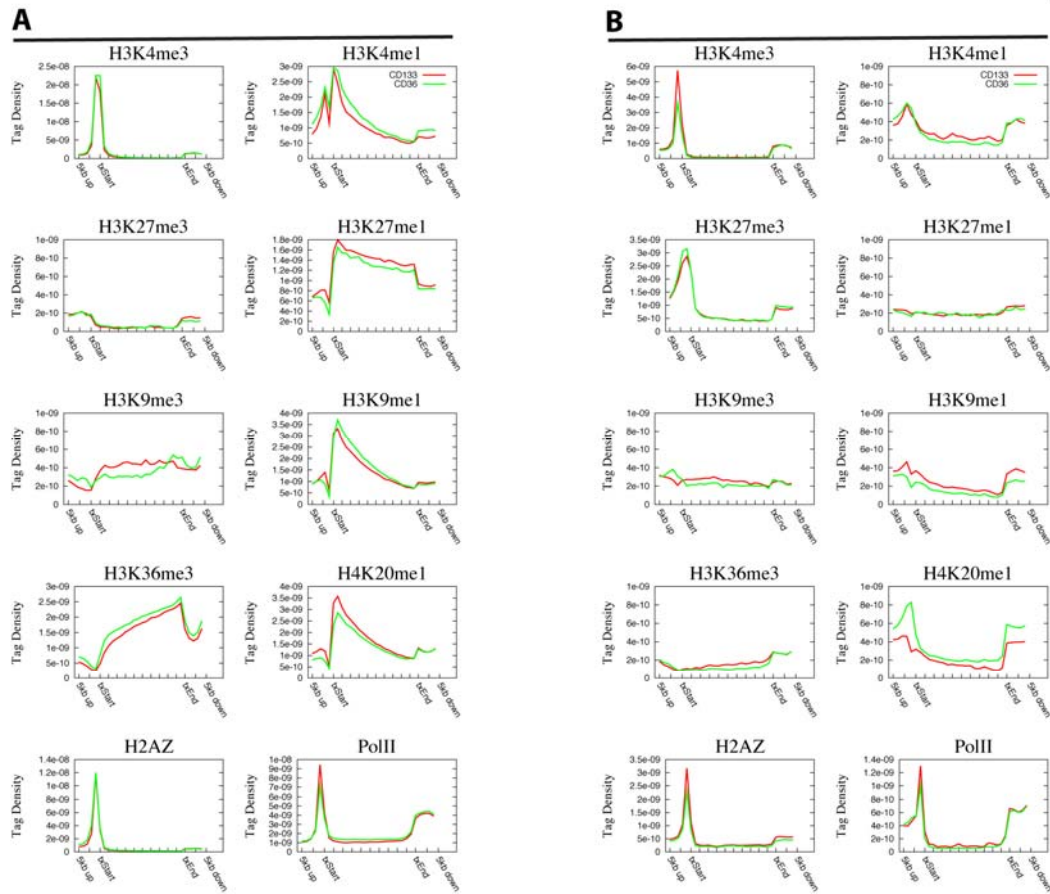

**Figure S10. Histone modification profiles of 9,198 constitutively expressed genes (A) and 7,420 always-silent genes (B) in CD133<sup>+</sup> and CD36<sup>+</sup> cells.**

Figure S11

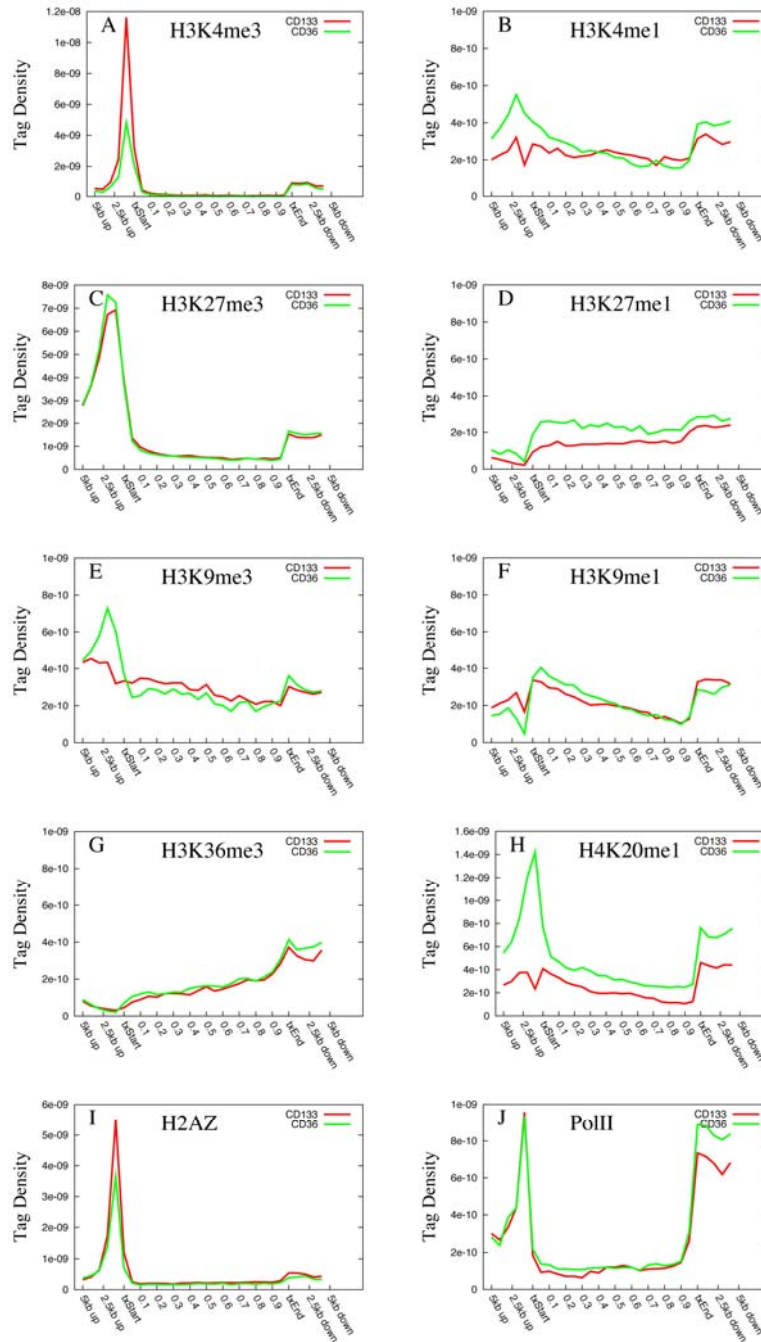

**Figure S11. Global modification changes of bivalent genes.** Histone modification profiles of 2,910 bivalent genes across the gene bodies as well as 5 kb 5' and 3' of the gene bodies. The modification patterns are shown in red in CD133<sup>+</sup> cells and in green in CD36<sup>+</sup> cells.

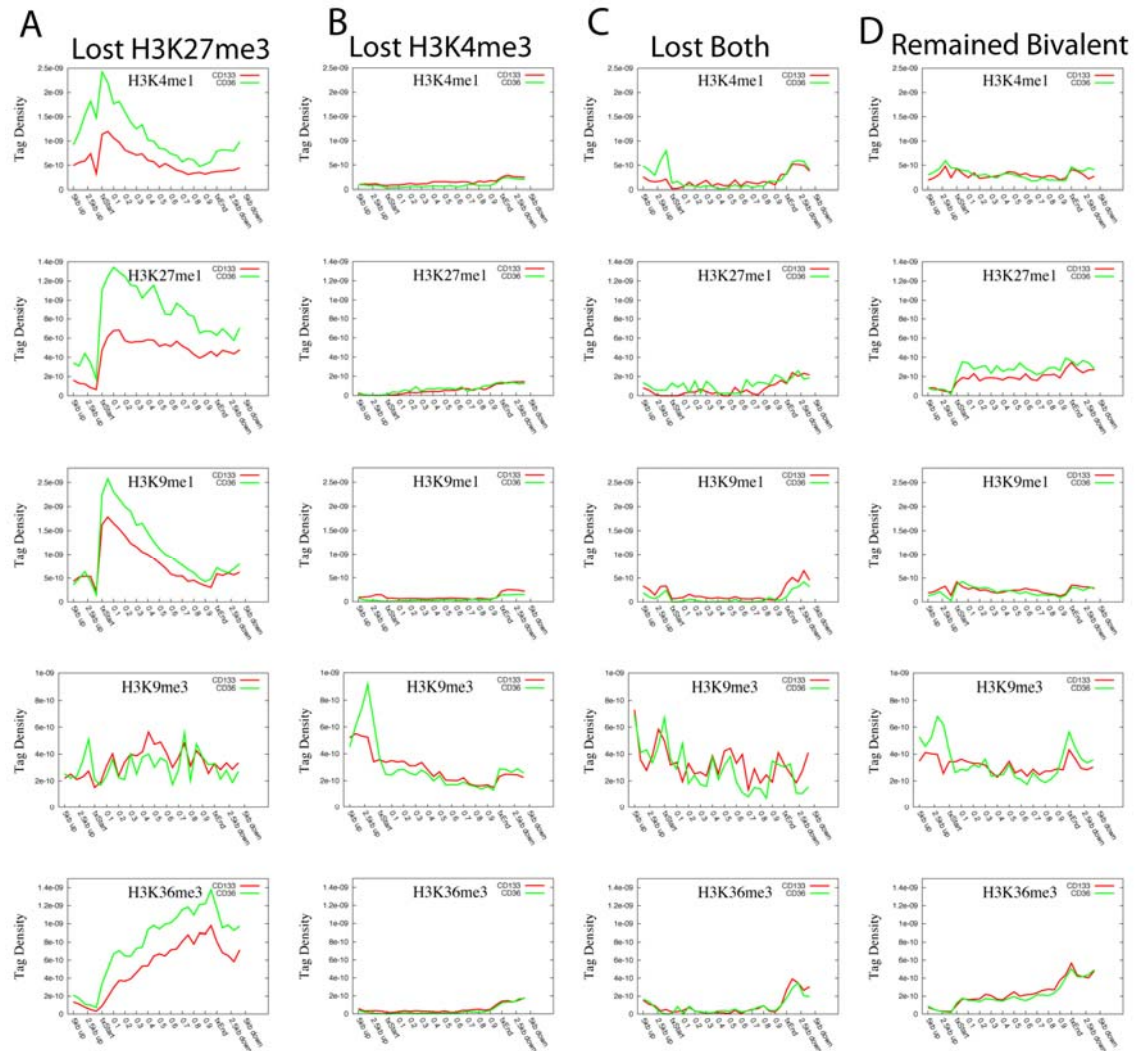

**Figure S12. Distinct histone modification changes are associated with different fates of bivalent genes.** Histone modification profiles for the bivalent genes that lost H3K27me3 (A), H3K4me3 (B), both H3K27me3 and H3K4me3 (C), or remained as bivalent (D) during differentiation.

Figure S13

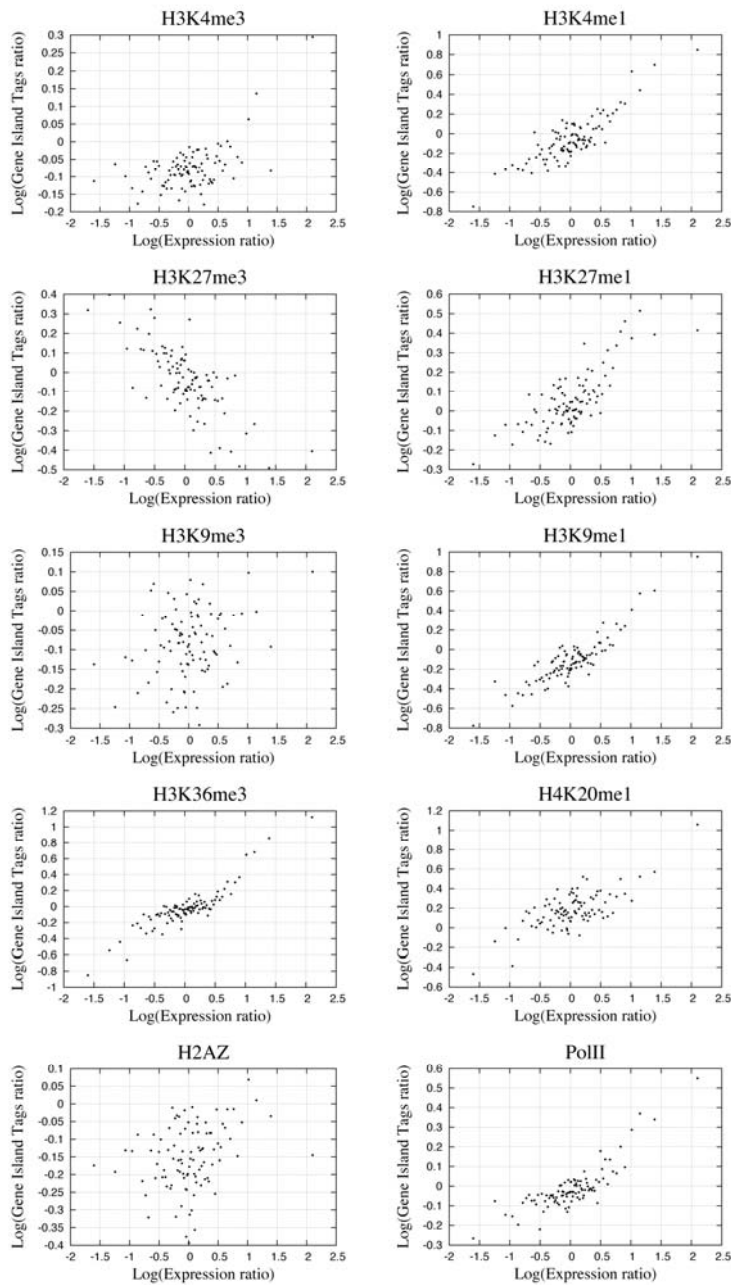

**Figure S13. Correlation between changes in gene expression and histone modification in the gene body regions of bivalent genes during differentiation from CD133<sup>+</sup> to CD36<sup>+</sup> cells.** The fold changes in both expression level and histone modification level were calculated for each gene during differentiation. The genes were grouped to 30-gene sets according to their expression changes and the changes were averaged for each set of 30 genes (one dot in the figure); the histone modification changes were then averaged for the same sets of 30-genes. The y-axis indicates the fold change (log<sub>10</sub> scale) of histone modification in the promoter region. The x-axis indicates that the fold change of expression levels. The clear gaps in some figures are due to cut-off thresholds of histone modification islands.

Figure S14

Promoters associated with H3K4me1, H3K9me1, H3K27me1 but not H3K4me3 in CD133<sup>+</sup> cells

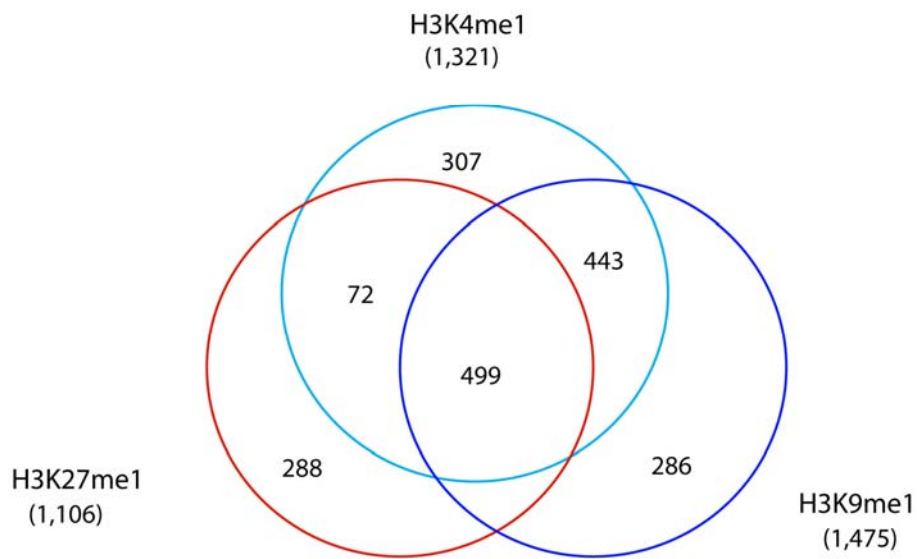

**Figure S14. Correlation of H3K4me1, H3K9me1 and H3K27me1 modifications.** The promoters associated with H3K4me3 were excluded from this analysis.
